# Supplementary material for: A sponge network-shaped Mn3O4/C anode derived from a simple, one-pot metal organic framework-combustion technique for improved lithium ion storage
Source: Royal Society of Chemistry journal article supplement (doi:10.1039/c6qi00348f), 2016-01-01
Supplement: c6qi00348f1.pdf [file c6qi00348f1.pdf]

## Supplementary Information

### **Sponge network-shaped Mn<sub>3</sub>O<sub>4</sub>/C anode derived from a simple, one-pot metal organic framework-combustion technique for improved lithium ion storage**

Balaji Sambandam,<sup>‡</sup> Vaiyapuri Soundharrajan,<sup>‡</sup> Vinod Mathew, Jinju Song, Sungjin Kim,  
Jeonggeun Jo, Duong Pham Tung, Seokhun Kim and Jaekook Kim\*

Department of Materials Science and Engineering, Chonnam National University,  
Gwangju 500-757, South Korea.

\*E-mail: [jaekook@chonnam.ac.kr](mailto:jaekook@chonnam.ac.kr)

<sup>‡</sup>These authors contributed equally to this work.

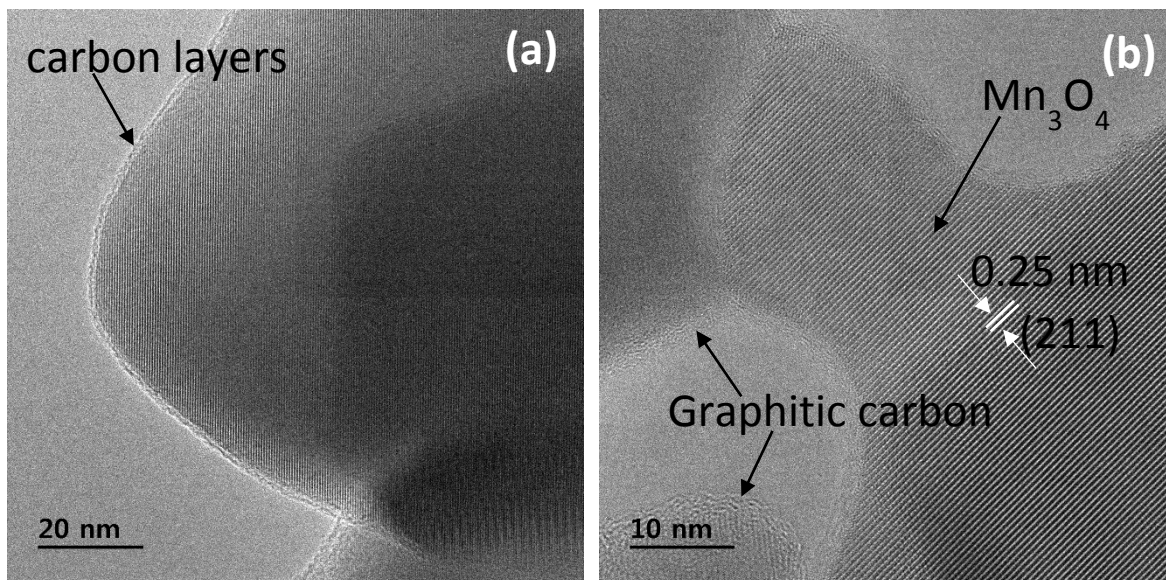

**Fig. S1.** HR-TEM images of Mn<sub>3</sub>O<sub>4</sub> (a) low magnification; (b) high magnification shows distinguished lattice fringes from the surface carbon to the core

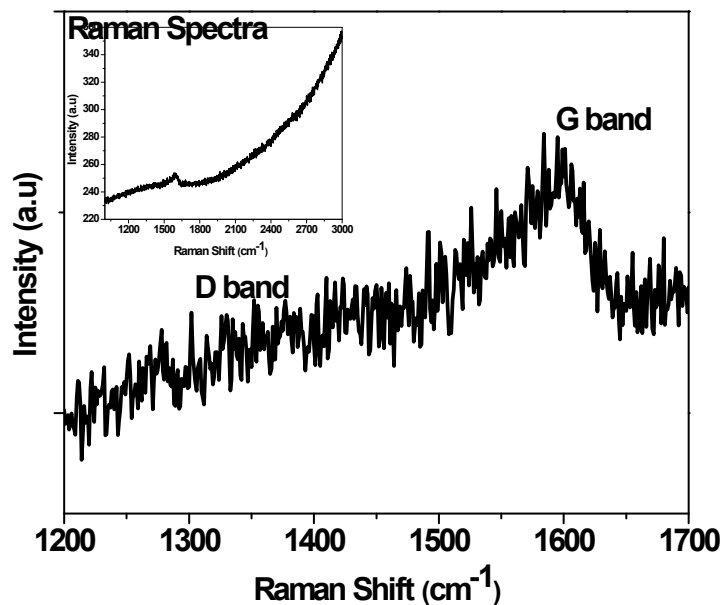

**Fig. S2.** Raman spectra for Mn<sub>3</sub>O<sub>4</sub>/C at a frequency region of 1200-1700 cm<sup>-1</sup>; inset: extended region to 3000 cm<sup>-1</sup>.

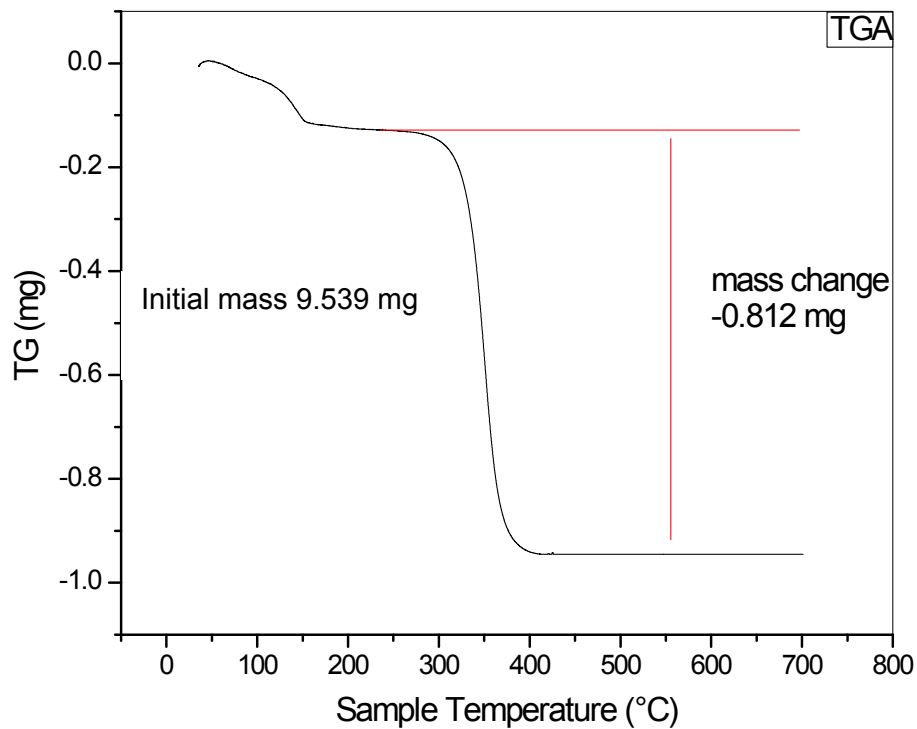

Fig. S3 TGA analysis for  $\text{Mn}_3\text{O}_4/\text{C}$

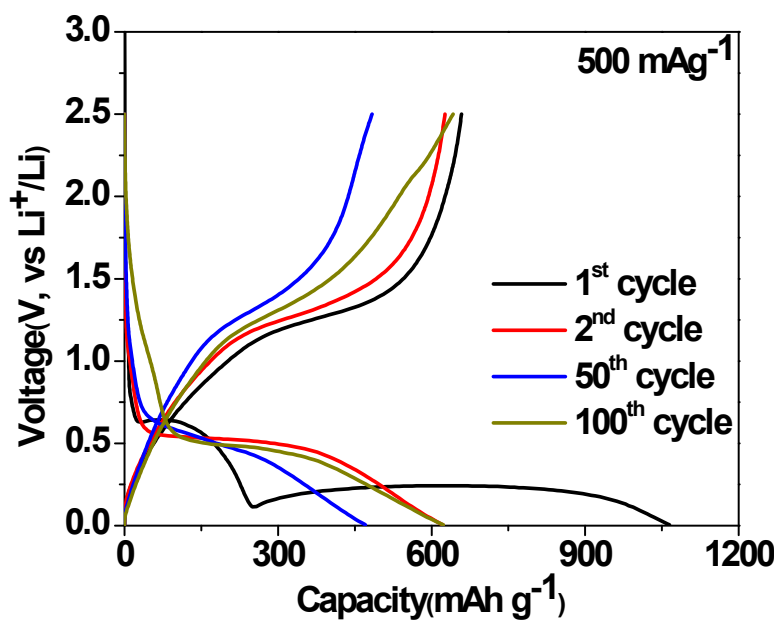

Fig. S4. Selected charge/discharge profiles at a current density  $500 \text{ mA g}^{-1}$

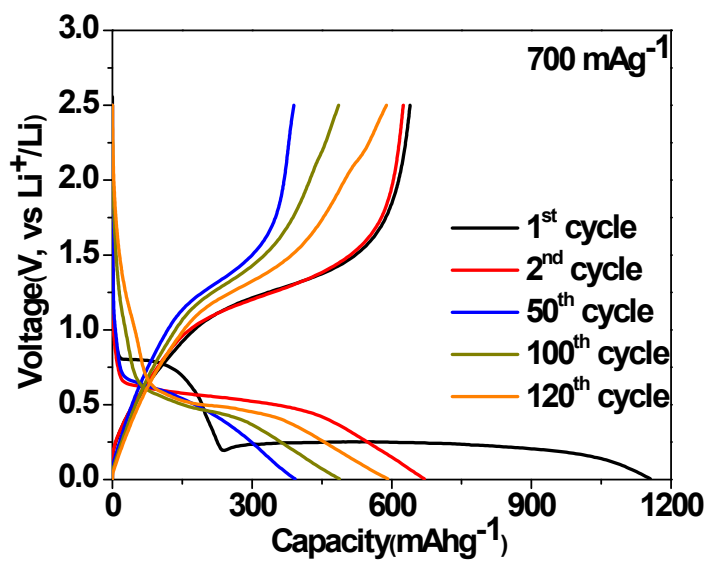

Fig. S5. Selected charge/discharge profiles at a current density  $700 \text{ mA g}^{-1}$

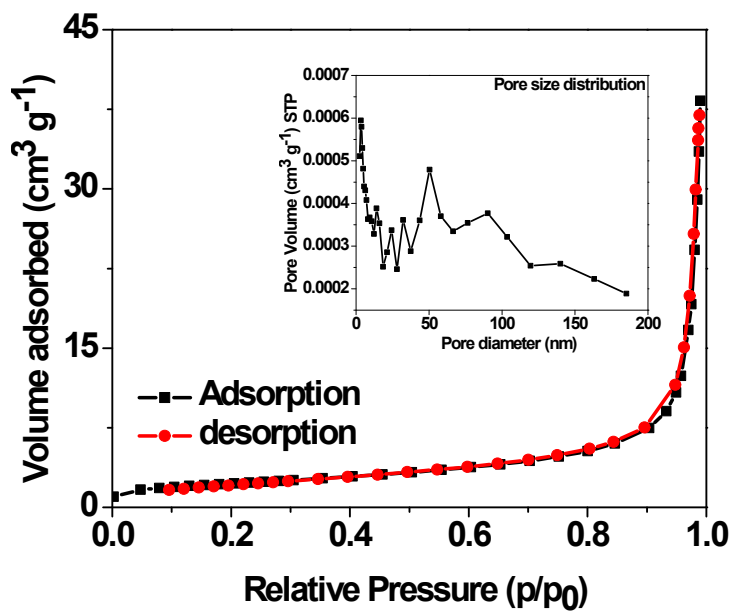

Fig. S6. BET surface area profile of adsorption/desorption isotherm curve. Inset: pore size distribution for  $\text{Mn}_3\text{O}_4$  with sponge network morphology

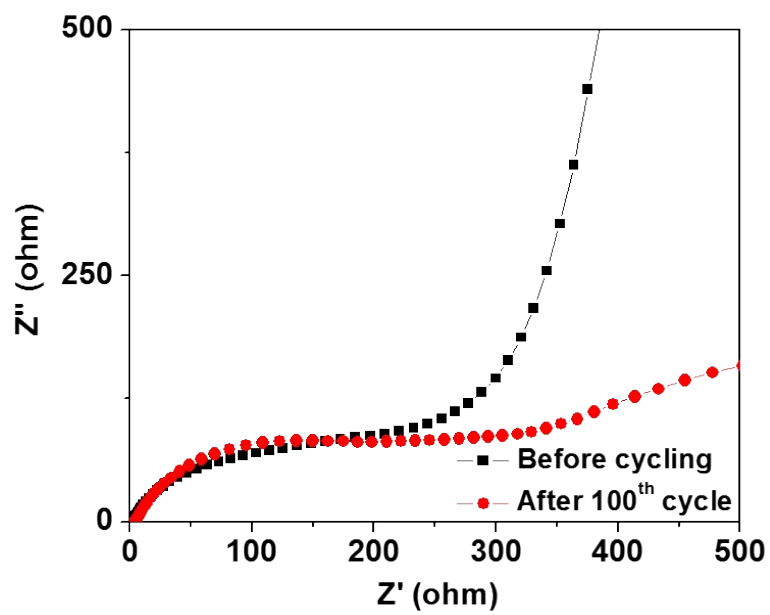

**Fig. S7.** EIS measurements before and after cycling at 200 mA g<sup>-1</sup> current density

**Table S1.** Morphology dependent electrochemical performance for Mn<sub>3</sub>O<sub>4</sub> anode synthesized by different techniques.

| s.no | materials/morphology                                                           | current density<br>mA g <sup>-1</sup> | cycles | discharge capacity; capacity retention mAh g <sup>-1</sup> ; CE%                             | rate capability (mAh g <sup>-1</sup> ) at current density (mA g <sup>-1</sup> ) | potential window (V) | Ref.      |
|------|--------------------------------------------------------------------------------|---------------------------------------|--------|----------------------------------------------------------------------------------------------|---------------------------------------------------------------------------------|----------------------|-----------|
| 1    | Mn <sub>3</sub> O <sub>4</sub> /C sponge network                               | 200                                   | 100    | 1185/1 <sup>st</sup> cycle;<br>770/100 <sup>th</sup> cycle;<br>100%/100 <sup>th</sup> cycle  | ~150 at 10000                                                                   | 0.005 to 2.5         | This work |
|      |                                                                                | 500                                   | 120    | 1065/1 <sup>st</sup> cycle;<br>651/120 <sup>th</sup> cycle;<br>97.6%/100 <sup>th</sup> cycle |                                                                                 |                      |           |
|      |                                                                                | 700                                   | 120    | 1155/1 <sup>st</sup> cycle;<br>~591/120 <sup>th</sup> cycle;<br>100%/120 <sup>th</sup> cycle |                                                                                 |                      |           |
| 2    | Highly Flexible Graphene/Mn <sub>3</sub> O <sub>4</sub> Nanocomposite Membrane | 100                                   | 100    | 1271/1 <sup>st</sup> cycle;<br>802/100 <sup>th</sup> cycle;<br>~99%/100 <sup>th</sup> cycle  | 308 at 2000                                                                     | 0.005 to 3.0         | SR1       |
| 3    | Mn <sub>3</sub> O <sub>4</sub> octahedra                                       | 100                                   | 500    | 918/1 <sup>st</sup> cycle;<br>746/500 <sup>th</sup> cycle;<br>81.3%/500 <sup>th</sup> cycle  | 240 at 1500                                                                     | 0.005 to 3.0         | SR2       |
|      |                                                                                | 300                                   | 500    | 807/1 <sup>st</sup> cycle;<br>628/500 <sup>th</sup> cycle;<br>77.8%/500 <sup>th</sup> cycle  |                                                                                 |                      |           |
| 4    | Mn <sub>3</sub> O <sub>4</sub> Nanorods                                        | 0.1 C (<100 mA g <sup>-1</sup> )      | 100    | 1050/1 <sup>st</sup> cycle;<br>108/100 <sup>th</sup> cycle;<br>10.3%/100 <sup>th</sup> cycle | ---                                                                             | 0.005 to 3.0         | SR3       |

|    |                                                                                              |                                                    |                       |                                                                                                                                                                                      |                          |             |      |
|----|----------------------------------------------------------------------------------------------|----------------------------------------------------|-----------------------|--------------------------------------------------------------------------------------------------------------------------------------------------------------------------------------|--------------------------|-------------|------|
| 5  | Order-aligned Mn <sub>3</sub> O <sub>4</sub> nanostructure                                   | 940<br><br>20 C<br>40 C                            | 100<br><br>100<br>100 | 919/1 <sup>st</sup> cycle; 882/85 <sup>th</sup> cycle; 96.0%/85 <sup>th</sup> cycle;<br><br>637/100 <sup>th</sup> cycle;<br>494/100 <sup>th</sup> cycle;                             | 550 at 32 C              | 0.01 to 3.0 | SR4  |
| 5  | Mesoporous stacked Mn <sub>3</sub> O <sub>4</sub> nanosheets                                 | 0.1 C (<100 mA g <sup>-1</sup> )                   | 60                    | 824/1 <sup>st</sup> cycle;<br>400/60 <sup>th</sup> cycle;                                                                                                                            | 298 at 1.5 C             | 0.01 to 3.0 | SR4  |
| 7  | Mn <sub>3</sub> O <sub>4</sub> Fibers                                                        | 0.5 mA cm <sup>-2</sup> (~208 mA g <sup>-1</sup> ) | 50                    | 860/1 <sup>st</sup> cycle;<br>450/50 <sup>th</sup> cycle;<br>52.3%/50 <sup>th</sup> cycle                                                                                            | --                       | 0.01 to 3.0 | SR6  |
| 8  | Mn <sub>3</sub> O <sub>4</sub> -spongelike nanostructure                                     | 30                                                 | 40                    | 1327/1 <sup>st</sup> cycle;<br>~800/40 <sup>th</sup> cycle; 60.3%/40 <sup>th</sup> cycle                                                                                             | ~500 at 10C              | 0.01 to 3.0 | SR7  |
| 9  | Mn <sub>3</sub> O <sub>4</sub> NPs<br><br>Mn <sub>3</sub> O <sub>4</sub> NPs-Graphene Hybrid | 40                                                 | 100                   | 300/1 <sup>st</sup> cycle; 115/100 <sup>th</sup> cycle; 38.3%/10 <sup>th</sup> cycle<br><br>~900/1 <sup>st</sup> cycle                                                               | -----<br><br>390 at 1600 | 0.01 to 3.0 | SR8  |
| 10 | Mn <sub>3</sub> O <sub>4</sub> /VGCF Composite                                               | 100/200<br><br>500                                 | 120<br><br>200        | >1200/1 <sup>st</sup> cycle (100 mA g <sup>-1</sup> );<br>>1350/120 <sup>th</sup> cycle (200 mA g <sup>-1</sup> )<br><br>855/1 <sup>st</sup> cycle;<br>1391/200 <sup>th</sup> cycle; | 390 at 5000              | 0.01 to 3.0 | SR9  |
| 11 | Mn <sub>3</sub> O <sub>4</sub> tetragonal bipyramids                                         | 0.2 C                                              | 56                    | 1141/1 <sup>st</sup> cycle;<br>822/56 <sup>th</sup> cycle;<br>100%/56 <sup>th</sup> cycle;                                                                                           | 471 at 2C                | 0.01 to 3.0 | SR10 |

|    |                                                                                  |                 |               |                                                                                                                                                                |               |             |      |
|----|----------------------------------------------------------------------------------|-----------------|---------------|----------------------------------------------------------------------------------------------------------------------------------------------------------------|---------------|-------------|------|
| 12 | Mn <sub>3</sub> O <sub>4</sub><br>-coated carbon<br>nanofibers on copper<br>foam | 100<br><br>5C   |               | 1172/1 <sup>st</sup> cycle;<br>> 1100/ 100 <sup>th</sup> cycle<br><br>300/100 <sup>th</sup> cycle                                                              | 391 at 5C     | 0.01 to 3.0 | SR11 |
| 13 | Carbon quantum dot<br>coated Mn <sub>3</sub> O <sub>4</sub>                      | 100             | 50/100        | 1125/ 1 <sup>st</sup> cycle;<br>791/100 <sup>th</sup> cycle;<br>99%/100 <sup>th</sup> cycle                                                                    | 304 at 1000   | 0.01 to 3.0 | SR12 |
| 14 | Mn <sub>3</sub> O <sub>4</sub><br>/graphene composites                           | 60              | 40            | ~1600/1 <sup>st</sup> cycle;<br>>500/ 40 <sup>th</sup> cycle                                                                                                   | ~200 at 1500  | 0.01 to 3.0 | SR13 |
| 15 | Mn <sub>3</sub> O <sub>4</sub><br>nanocrystals<br>on reduced graphene<br>oxide   | 100<br><br>1200 | 10<br><br>500 | 1912/1 <sup>st</sup> cycle;<br>1198/10 <sup>th</sup> cycle;<br>95.2%/10 <sup>th</sup> cycle<br><br>370/1 <sup>st</sup> cycle;<br>330/ 500 <sup>th</sup> cycle; | 180 at 2000   | 0.01 to 3.0 | SR14 |
| 16 | Mn <sub>3</sub> O <sub>4</sub><br>@C core-shell                                  | 500             | 100           | 1525/1 <sup>st</sup> cycle;<br>765/100 <sup>th</sup> cycle;                                                                                                    | 380 at 2000   | 0.01 to 3.0 | SR15 |
| 17 | Carbon Layer Coated<br>Mn <sub>3</sub> O <sub>4</sub><br>Nanorod                 | 40              | 50            | 974/1 <sup>st</sup> cycle;<br>550 /50 <sup>th</sup> cycle;<br>>98%/50 <sup>th</sup> cycle                                                                      | --            | 0.01 to 3.0 | SR16 |
| 18 | Mn <sub>3</sub> O <sub>4</sub><br>hollow spheres                                 | 200             | 140           | 1609/1 <sup>st</sup> cycle;<br>980/140 <sup>th</sup> cycle;<br>100%/140 <sup>th</sup> cycle                                                                    | ~300 at 10000 | 0.01 to 3.0 | SR17 |



|    |                                                                                        |     |     |                                                                                             |             |              |      |
|----|----------------------------------------------------------------------------------------|-----|-----|---------------------------------------------------------------------------------------------|-------------|--------------|------|
| 19 | Porous Mn <sub>3</sub> O <sub>4</sub> nanorod/reduced graphene oxide hybrid paper      | 100 | 100 | 943/1 <sup>st</sup> cycle;<br>573/100 <sup>th</sup> cycle;<br>100%/100 <sup>th</sup> cycle  | 196 at 2000 | 0.005 to 3.0 | SR18 |
| 20 | Mn <sub>3</sub> O <sub>4</sub> / graphene composites                                   | 60  | 100 | 897/1 <sup>st</sup> cycle;<br>~500/100 <sup>th</sup> cycle;                                 | 220 at 750  | 0.005 to 3.0 | SR19 |
| 21 | Mn <sub>3</sub> O <sub>4</sub> nanosheet on graphene via forming a 2D–2D nanostructure | 50  | 50  | 1890/1 <sup>st</sup> cycle;<br>1180/50 <sup>th</sup> cycle;                                 | 637 at 1000 | 0.01 to 3.0  | SR20 |
| 22 | Mn <sub>3</sub> O <sub>4</sub> –graphene nanocomposite                                 | 40  | 50  | 1354/1 <sup>st</sup> cycle;<br>~900/50 <sup>th</sup> cycle;<br>100%/100 <sup>th</sup> cycle | 400 at 2000 | 0.1 to 3.0   | SR21 |
| 23 | Single crystalline Mn <sub>3</sub> O <sub>4</sub> nano-octahedra                       | 50  | 50  | 1504/1 <sup>st</sup> cycle;<br>500/50 <sup>th</sup> cycle;<br>100%/50 <sup>th</sup> cycle;  | 350 at 500  | 0.1 to 3.0   | SR22 |
| 24 | Mn <sub>3</sub> O <sub>4</sub> nanocrystals anchored on multi-walled carbon nanotubes  | 100 | 50  | 1380/1 <sup>st</sup> cycle;<br>592/50 <sup>th</sup> cycle;<br>63%/50 <sup>th</sup> cycle    | 387 at 1000 | 0.1 to 3.0   | SR23 |
| 25 | Mn <sub>3</sub> O <sub>4</sub> -GN composite aerogels                                  | 50  | 60  | 1132/1 <sup>st</sup> cycle;<br>665/60 <sup>th</sup> cycle;<br>97.7%/60 <sup>th</sup> cycle  | -----       | 0.1 to 3.0   | SR24 |
| 26 | Mn <sub>3</sub> O <sub>4</sub> Nanoparticles on Nitrogen-doped Graphene                | 200 | 40  | 1275/1 <sup>st</sup> cycle;<br>800/40 <sup>th</sup> cycle;                                  | 382 at 2000 | 0.1 to 3.0   | SR25 |

1C = 946 mAh g<sup>-1</sup>

## References

- SR1. Q. Hao, J. Wang and C. Xu, *J. Mater. Chem. A*, **2**, **2014**, 87–93.
- SR2. J. G. Wang, D. Jin, R. Zhou, X. Li, X. Liu, C. Shen, K. Xie, B. Li, F. Kang, B. Wei, *ACS Nano*, **2016**, DOI: 10.1021/acsnano.6b02319.
- SR3. X. Shen, Z. Ji, H. Miao, J. Yang and K. Chen, *J. Alloys Compd.*, **509**, **2011**, 5672–5676.
- SR4. J. Wang, N. Du, H. Wu, H. Zhang, J. Yu and D. Yang, *J. Power Sources*, **222**, **2013**, 32–37.
- SR5. D. P. Dubal and R. Holze, *RSC Adv.*, **2**, **2012**, 12096-12100.
- SR6. Q. Fan and M. S. Whittingham, *Electrochem. Solid-State Lett.*, **10**, **2007**, A48-A51.
- SR7. J. Gao, M. A. Lowe and H. D. Abruna, *Chem. Mater.*, **23**, **2011**, 3223–3227.
- SR8. H. Wang, L. Cui, Y. Yang, H. S. Casalongue, J. T. Robinson, Y. Liang, Y. Cui, H. Dai, *J. Am. Chem. Soc.*, **132**, **2010**, 13978–13980.
- SR9. F. Ma, A. Yuan and J. Xu, *ACS Appl. Mater. Interfaces*, **6**, **2014**, 18129–18138.
- SR10. T. Li, C. Guo, B. Sun, T. Li, Y. Li, L. Hou and Y. Wei, *J. Mater. Chem. A*, **3**, **2015**, 7248–7254.
- SR11. H. Yue, F. Li, Z. Yang, X. Li, S. Lin and D. He, *J. Mater. Chem. A*, **2**, **2014**, 17352–17358.
- SR12. M. Jing, J. Wang, H. Hou, Y. Yang, Y. Zhang, C. Pan, J. Chen, Y. Zhu and X. Ji, *J. Mater. Chem. A*, **3**, **2015**, 16824-16830.
- SR13. I. Nam, N.D. Kim, G. Kim, J. Park and J. Yi, *J. Power Sources*, **244**, **2013**, 56-62.
- SR14. H. Huang, L. Zhang, Y. Xia, Y. Gan, X. Tao, C. Liang and W. Zhang, *New J. Chem.*, **38**, **2014**, 4743—4747.
- SR15. X. Ma, Y. Zhai, N. Wang, J. Yang and Y. Qian, *RSC Adv.*, **5**, **2015**, 46829-46833.
- SR16. G. Jian, Y. Xu, L. Lai, C. Wang and M. R. Zachariah, *J. Mater. Chem. A*, **2**, **2014**, 4627–4632.
- SR17. C. Wang, L. Yin, D. Xiang and Y. Qi, *ACS Appl. Mater. Interfaces*, **4**, **2012**, 1636–1642.

- SR18. S.K. Park, C.Y. Seong, S. Yoo and Y. Piao, *Energy*, 99, **2016**, 266-273.
- SR19. Y. Ren, J. Wang, X. Huang, B. Yang and J. Ding, *RSC Adv.*, 5, **2015**, 59208–59217.
- SR20. Y. Zhao, G. Chen, C. Yan, C. Lv, R. Wang and J. Sun, *RSC Adv.*, 5, **2015**, 106206-106212.
- SR21. L. Li, Z. Guo, A. Du and H. Liu, *J. Mater. Chem.*, 22, **2012**, 3600–3605.
- SR22. S. Z. Huang, J. Jin, Y. Cai, Y. Li, H. Y. Tan, H. E. Wang, G. Van Tendeloo, B. L. Su, *Nanoscale*, 6, **2014**, 6819–6827.
- SR23. Z. H. Wang, L. X. Yuan, Q. G. Shao, F. Huang, Y. H. Huang, *Mater. Lett.*, 80, **2012**, 110–113.
- SR24. H. Tang, Y. Sui, X. Zhu and Z. Bao, *Nanoscale Res. Lett.*, 10, **2015**, 260.
- SR25. S. K. Park, A. Jin, S. H. Yu, J. Ha, B. Jang, S. Bong, S. Woo, Y. E. Sung and Y. Piao, *Electrochim. Acta*, 120, **2014**, 452–459.
